# Supplementary material for: Phase I clinical trial of the base excision repair inhibitor methoxyamine in combination with fludarabine for patients with advanced hematologic malignancies
Source: PubMed Central journal article supplement (PMC5668101; doi:10.18632/oncotarget.20094), 2017-08-09
Supplement: oncotarget-08-79864-s001.pdf [file oncotarget-08-79864-s001.pdf]

# Phase I clinical trial of the base excision repair inhibitor methoxyamine in combination with fludarabine for patients with advanced hematologic malignancies

## SUPPLEMENTARY MATERIALS

**Supplementary Table 1: Changes in subjects with circulating malignant lymphocytes: Clinical laboratory studies, pharmacodynamic results, response and pharmacokinetic results**

|                            | Baseline         | 24 hours <sup>1</sup> | 48 hours         | 168 hours        | Response | Change in lymph node size at best response | MX dose level (mg/m <sup>2</sup> ) | MX half-life (hours) | MX Cmax (ng/mL) | MX AUC (h*ng/mL) |
|----------------------------|------------------|-----------------------|------------------|------------------|----------|--------------------------------------------|------------------------------------|----------------------|-----------------|------------------|
| Patient 8                  |                  |                       |                  |                  |          |                                            |                                    |                      |                 |                  |
| ALC                        | 19260            | 16580                 | 4280             | 2290             | SD       | -33                                        | 30                                 | 38.23                | 29.6            | 1601.92          |
| Comet Tail Length (n, SEM) | 12.89 (94, 1.56) | 13.83 (127,1.46)      | 31.75 (93,1.85)  | 46.93 (70, 2.02) |          |                                            |                                    |                      |                 |                  |
| Patient 9                  |                  |                       |                  |                  |          |                                            |                                    |                      |                 |                  |
| ALC                        | 59930            | 51600                 | 3660             | 2900             | PD       | -34                                        | 60                                 | 49.5                 | 21.9            | 1425.88          |
| Comet Tail Length (n, SEM) | 5.22 (126,0.84)  | 13.49 (94,1.2)        | 16.72 (117,1.06) | 20.46 (119,1.37) |          |                                            |                                    |                      |                 |                  |
| Patient 10                 |                  |                       |                  |                  |          |                                            |                                    |                      |                 |                  |
| ALC                        | 84240            | 76190                 | 21420            | 6230             | PR       | -50                                        | 60                                 | 38.92                | 40.6            | 1977.4           |
| Comet Tail Length (n, SEM) | 6.77 (49, 2.33)  | 2.67 (150,0.45)       | 3.25 (131,0.54)  | 2.51 (108,0.6)   |          |                                            |                                    |                      |                 |                  |
| Patient 15                 |                  |                       |                  |                  |          |                                            |                                    |                      |                 |                  |
| ALC                        | 182750           | 184800                | 158860           | 137590           | SD       | NM <sup>2</sup>                            | 120                                | 33.54                | 159             | 6998.87          |
| Comet Tail Length (n, SEM) | 86.06 (88,2.64)  | 87.96 (100,2.36)      | 84.07 (107,2.52) | 87.01 (86,2.61)  |          |                                            |                                    |                      |                 |                  |
| Patient 17                 |                  |                       |                  |                  |          |                                            |                                    |                      |                 |                  |
| ALC                        | 3940             | 2680                  | 140              | 370              | SD       | -27                                        | 120                                | 68.47                | 113             | 10268.35         |
| Comet Tail Length (n, SEM) | 5.49 (92,1.04)   | 9.5 (137,1.4)         | 10.27 (119,1.25) | 22.07 (53,3.51)  |          |                                            |                                    |                      |                 |                  |
| Patient 18                 |                  |                       |                  |                  |          |                                            |                                    |                      |                 |                  |
| ALC                        | 4300             | 2140                  | 500              | 850              | PD       | 27                                         | 120                                | 47.56                | 97.1            | 6126.17          |
| Comet Tail Length (n, SEM) | 1.73 (81,0.4)    | 1.35 (44,0.3)         | 1.25 (48,0.18)   | 2.38 (75,1.24)   |          |                                            |                                    |                      |                 |                  |
| Patient 19                 |                  |                       |                  |                  |          |                                            |                                    |                      |                 |                  |
| ALC                        | 6940             | 8430                  | 6310             | 1510             | PR       | -82                                        | 120                                | 37.73                | 58.9            | 2895.84          |
| Comet Tail Length (n, SEM) | 8.65 (117,1.7)   | 8.7 (91,1.8)          | 8.7 (91,1.8)     | 12.12 (107,1.57) |          |                                            |                                    |                      |                 |                  |

<sup>1</sup>One hour after methoxyamine infusion.

Non measured disease, subject only presented lymphocytosis.

ALC: absolute lymphocyte count; AUC: area under the curve; Cmax: maximum concentration; MX: methoxyamine; NM: non measured disease; PD: progressive disease; PR: partial remission; SD: stable disease; SEM: standard error of the mean.
